# Supplementary material
Source: Springer Nature journal article supplement (https://www.springermedizin.de/resource/supplementary/13012_2013_709_MOESM3_ESM.pdf/9630294)
Supplement: MOESM3 [file 9630294]

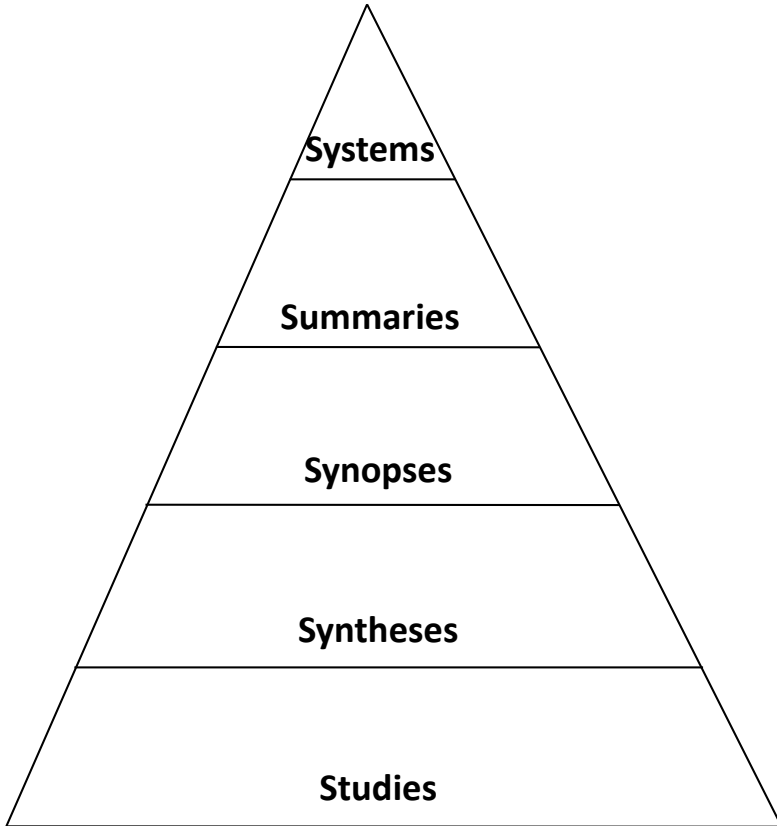

**Level 5** – Online decision-support systems where clinical data is linked with evidence (sources: none known specific to allied health or cerebral palsy)

---

**Level 4** – Comprehensive overviews of evidence related to a particular area (sources: none known specific to allied health or cerebral palsy)

---

**Level 3** – Brief critical appraisals of articles or reviews (sources: Allied Health Evidence, speechBITE, PEDro, Otseeker, PsychBITE)

---

**Level 2** - Systematic reviews answering a specific clinical question (sources: Cochrane Database of Systematic Reviews)

---

**Level 1** - Primary studies (sources: MEDLINE, PubMed, CINAHL)

---
